# Supplementary material for: Oxygenated organic molecules produced by low-NO x photooxidation of aromatic compounds and their contributions to secondary organic aerosol
Source: Copernicus journal article supplement (doi:10.5194/egusphere-2023-1215), 2023-07-10
Supplement: Supplementary file 1 [file egusphere-2023-1215-supplement.pdf]

*Supplement of*

**Oxygenated organic molecules produced by low-NO<sub>x</sub> photooxidation of aromatic compounds and their contributions to secondary organic aerosol**

Xi Cheng<sup>1</sup>, Yong Jie Li<sup>2</sup>, Yan Zheng<sup>1</sup>, Keren Liao<sup>1</sup>, Tong Zhu<sup>1</sup>, Chunxiang Ye<sup>1</sup>, Xinghua Qiu<sup>1</sup>, Theodore K. Koenig<sup>1</sup>, Yanli Ge<sup>1</sup>, Qi Chen<sup>1</sup>

<sup>1</sup>State Key Joint Laboratory of Environmental Simulation and Pollution Control, BIC-ESAT and IJRC, College of Environmental Sciences and Engineering, Peking University, Beijing, China

<sup>2</sup>Department of Civil and Environmental Engineering, Department of Ocean Science and Technology, and Centre for Regional Oceans, Faculty of Science and Technology, University of Macau, Taipa, Macau, China

**Correspondence:** Qi Chen (qichenpku@pku.edu.cn) and Yong Jie Li (yongjieli@um.edu.mo)

## S1. Methods

### Loss rate of OOMs

Losses of oxygenated organic molecules (OOMs) in an oxidation flow reactor (OFR) include the loss to the OFR walls ( $k_{\text{wall}}$ ,  $\text{s}^{-1}$ ), the loss to aerosol particles presented in the OFR (i.e., the condensation sink, CS,  $\text{s}^{-1}$ ), and the loss to non-condensable products due to continuous reaction with OH ( $k_{\text{OHloss}}$ ,  $\text{s}^{-1}$ ) (Palm et al., 2016). According to the method described by Brune (2019) and Huang et al. (2018),  $k_{\text{wall}}$  of 0.0023-0.0028  $\text{s}^{-1}$  are used in our experiments. The CS was calculated using the data from scanning mobility particle sizer (SMPS), the average CS for the experiments herein is 0.02-0.07  $\text{s}^{-1}$ . The average  $k_{\text{OHloss}}$  are then calculated as 0.02-0.04  $\text{s}^{-1}$  using the approach of Palm et al. (2016). More detailed descriptions could be found in our previous study (Cheng et al., 2021).

### VBS parametrization

The volatility of gaseous OOMs was estimated using a volatility parameterization method (Mohr et al., 2019). The saturation concentrations ( $C^*$ ) at 300 K for individual organic compounds are given by:

$$\log_{10}C^* = (n_0 - n_C) \times b_C - n_O \times b_O - 2 \left( \frac{n_C \times n_O}{n_C + n_O} \right) \times b_{CO} \quad (\text{S1})$$

where  $n_0 = 25$ ,  $b_C = 0.475$ ,  $b_O = 0.2$ ,  $b_{CO} = 0.9$ , and  $n_C$  and  $n_O$  are the number of carbon and oxygen atoms in the compound, respectively (Donahue et al., 2011).

The saturation concentrations of compounds at ambient temperature were obtained by:

$$\log_{10}C^*(T) = \log_{10}C^*(300\text{K}) + \frac{\Delta H_{\text{vap}}}{R \ln(10)} \left( \frac{1}{300} - \frac{1}{T} \right) \quad (\text{S2})$$

where the evaporation enthalpy  $\Delta H_{\text{vap}}$  can be linked to saturation concentration  $\log_{10}C^*(300\text{K})$  via:

$$\Delta H_{\text{vap}} [\text{kJ mol}^{-1}] = -11 \log_{10}C^*(300\text{K}) + 129 \quad (\text{S3})$$

The OOMs were then grouped into different bins within a volatility basis set (VBS) based on  $C^*$  (Donahue et al., 2006), and further classified as: ultralow volatility organic compound (ULVOC,  $\log C^* \leq -9.5$ ); extremely low volatility organic compound (ELVOC,  $-9.5 < \log C^* \leq -4.5$ ); low volatility organic compound (LVOC,  $-4.5 < \log C^* \leq -0.5$ ); semi-volatile organic compound (SVOC,  $-0.5 < \log C^* \leq 2.5$ ); intermediate volatility organic compound (IVOC,  $2.5 < \log C^* \leq 6.5$ ) (Shrivastava et al., 2017; Bianchi et al., 2019; Schervish and Donahue, 2020).

### Aerosol growth model

To evaluate the contribution of OOMs to secondary organic aerosols (SOA) through condensation, we used the aerosol growth model to calculate the net condensation flux of the observed OOMs (Tröstl et al., 2016), as follows:

$$\phi_p = N_p \times \sigma_p \times s_p \times F_p \quad (\text{S4})$$

Combining the first three terms, then the modified equation is:

$$\phi_p = N_p \pi D_p^2 \times \frac{(D_p + D_i)^2 v_i}{D_p^2} \alpha_i \beta_i \times F_p \quad (\text{S5})$$

with  $N_p$  being the particle number concentration,  $D_p$  the particle diameter,  $D_i$  the vapour diameter,  $v_i$  the center of mass velocity for particle and vapor,  $\alpha_i$  the accommodation coefficient,  $\beta_i$  the correction factor for the transition regime.  $F_p$  is

the driving force of condensation,  $F_p = C^v - X_p \gamma_p K_p C^*$ , where  $C^v$  is the vapour (OOMs) concentration,  $C^*$  is the saturation concentration,  $X_p$  is the mass fraction of OOMs of each VBS bin in the condensed phase, and  $\gamma_p$  is the mass-based activity coefficient in the condensed phase (assuming  $\gamma_p = 1$  as in ideal organic solution). The Kelvin term,  $K_p = \exp\left(\frac{4\sigma M}{RT\rho D_p}\right)$ , which is related to the surface tension  $\sigma$ , molar weight  $M$ , and density  $\rho$ .

When the organic vapours in the gas and condensed phases reach equilibrium ( $F_p$  is zero), equilibrium partitioning theory is used to describe the condensation and evaporation of the organics onto or from particle surface (Pankow, 1994). The fraction of species  $i$  in the condensed phase is defined as:

$$f_i = \frac{1}{1 + C^*/C_{OA}} \quad (S6)$$

where  $C_{OA}$  is the concentration of organic aerosol in the condensed phase.

## S2. General mechanism of OH-initiated chemistry of aromatic VOCs

The OH-initiated chemistry of aromatic volatile organic compounds (VOCs) mainly proceeds via addition to the aromatic ring to generate OH-aromatic adducts. If there are alkyl substitutions on the aromatic rings, reactions can also proceed via H-atom abstraction for normally  $\leq 10\%$  probability (Jenkin et al., 2003). The alkyl radicals (R) formed either way react with  $O_2$  and form a variety of  $RO_2$  radicals, which undergo the following reaction channels under low- $NO_x$  conditions: (1) bimolecular reaction route (reacting with  $HO_2$  or  $RO_2$  radicals) to form termination products or alkoxy radicals (RO), (2) phenolic route through  $HO_2$  elimination, and (3) bicyclic intermediate route through cyclization (Jenkin et al., 2003; Nishino et al., 2012). The new alkyl (R) radical from the important pathway (3) can be converted to a new  $RO_2$  radical by incorporating an  $O_2$  molecule, forming a host of monomeric and dimeric OOMs via reactions R-S1 to R-S7 (Cheng et al., 2021; Garmash et al., 2020). Among these reactions, R-S1 is the autoxidation pathway that incorporates more and more oxygen atoms into the products while forming peroxide groups (-OOH) by internal H-shift; R-S2, R-S3, and R-S5 are termination reactions that lead to various monomeric products with different functional groups; R-S4 and R-S6 are the RO pathway between reactions of  $RO_2$  and  $HO_2$  or  $RO_2$ , and subsequent isomerization of RO might result in a new  $RO_2$ ; R-S7 is the accretion reaction that leads to dimer formation.

Autoxidation pathway:

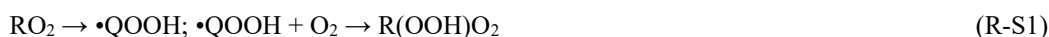

General  $RO_2$  pathways:

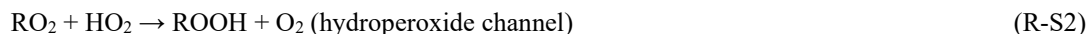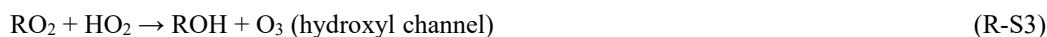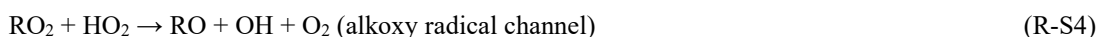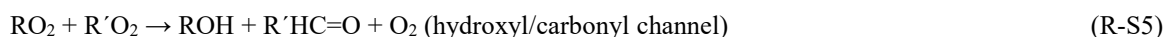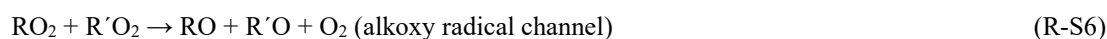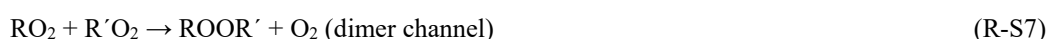

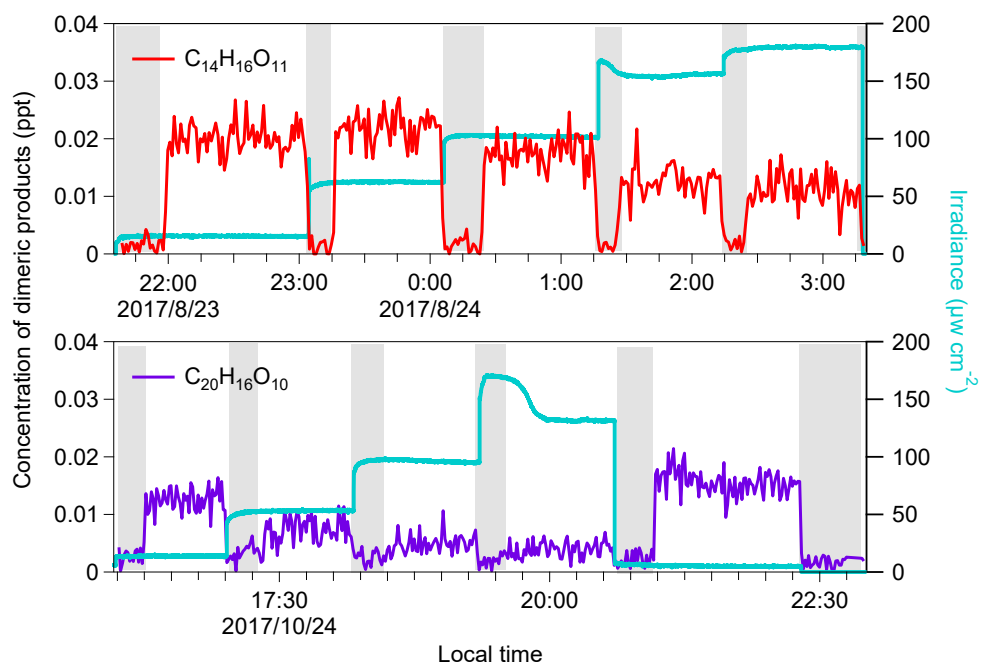

**Figure S1.** Time series of experimental conditions (irradiance in the OFR) and the example dimeric products from toluene and naphthalene oxidation. The grey shaded area represents “background” periods without VOC injection.

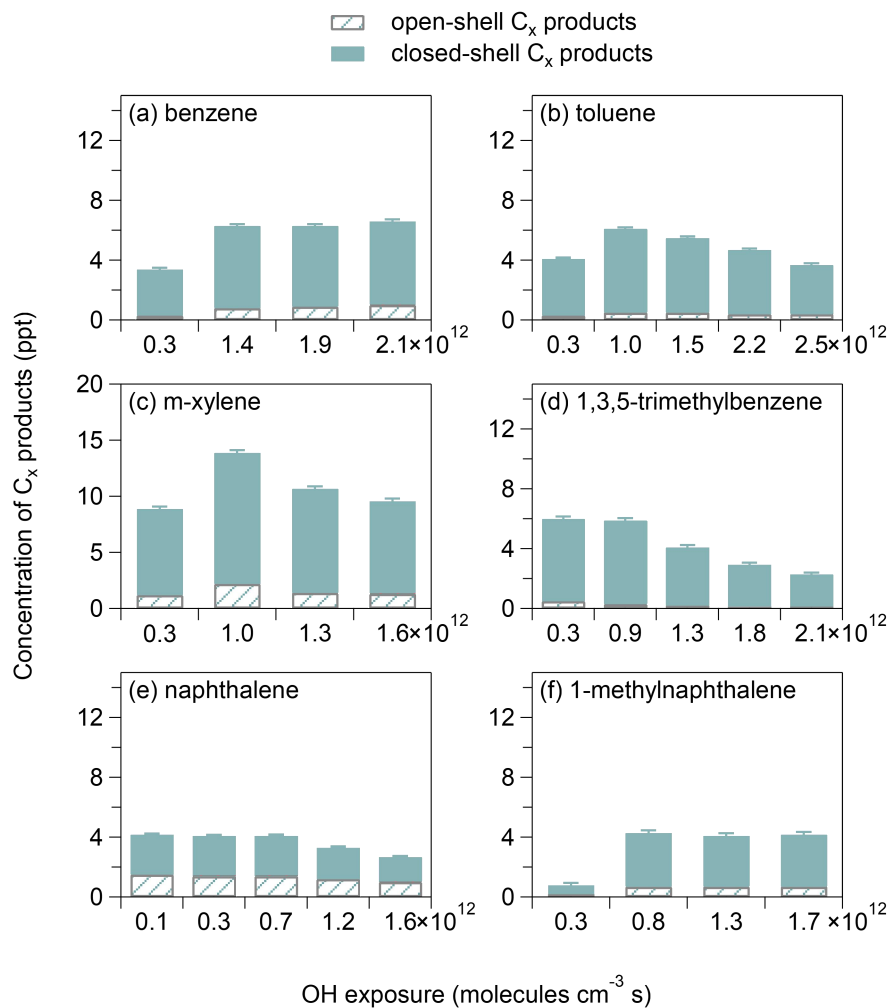

**Figure S2.** Concentrations of  $C_x$  products formed from the oxidation of (a) benzene, (b) toluene, (c) m-xylene, (d) 1,3,5-trimethylbenzene, (e) naphthalene and (f) 1-methylnaphthalene at different OH exposure.  $C_x$  products consist of open-shell and closed-shell monomers.

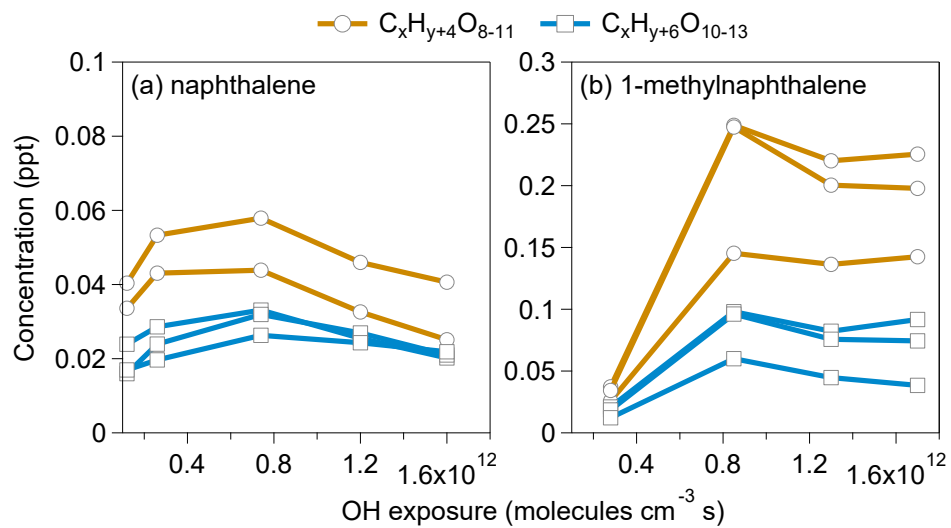

**Figure S3.** Concentrations of C<sub>x</sub>H<sub>y+4</sub>- and C<sub>x</sub>H<sub>y+6</sub>-series monomeric products formed from the oxidation of **(a)** naphthalene and **(b)** 1-methylnaphthalene at different OH exposure.

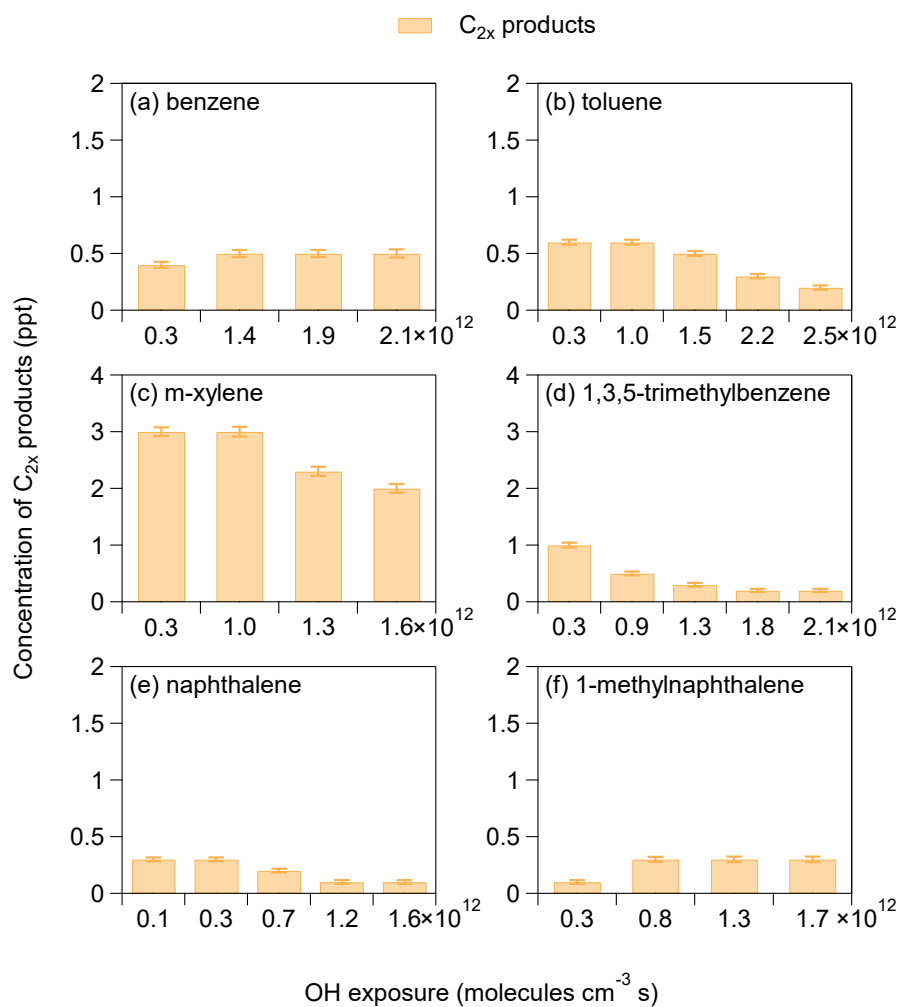

**Figure S4.** Concentrations of C<sub>2x</sub> products formed from the oxidation of **(a)** benzene, **(b)** toluene, **(c)** m-xylene, **(d)** 1,3,5-trimethylbenzene, **(e)** naphthalene and **(f)** 1-methylnaphthalene at different OH exposure.

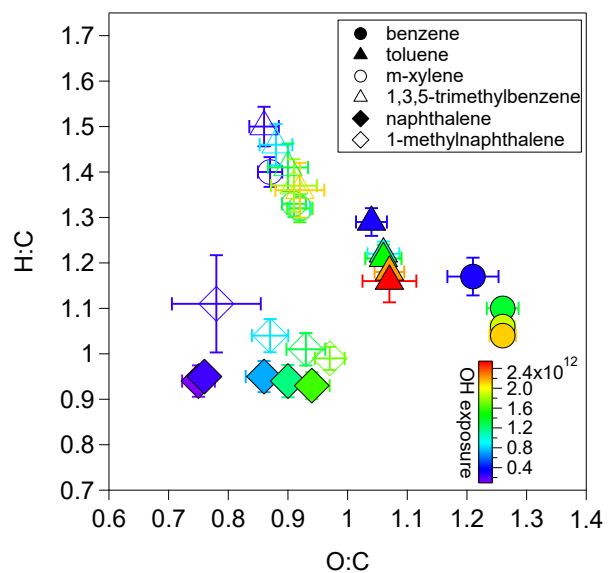

**Figure S5.** H:C and O:C ratios of gaseous OOMs formed from photooxidation of benzene, toluene, m-xylene, 1,3,5-trimethylbenzene, naphthalene and 1-methyl-naphthalene at different OH exposure.



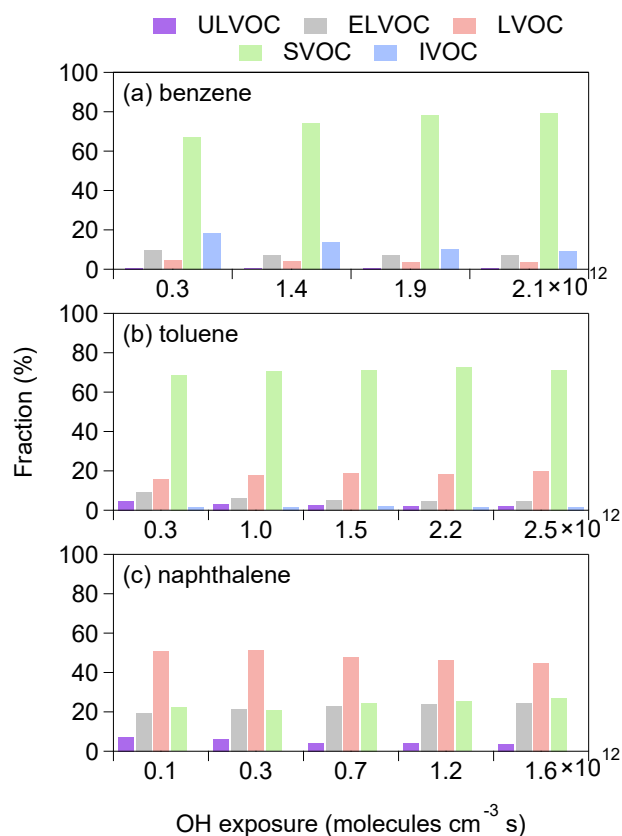

**Figure S6.** Concentration fractions of gaseous OOMs formed from the oxidation of **(a)** benzene, **(b)** toluene and **(c)** naphthalene at different OH exposure. OOMs are classified as five volatility classes: ULVOC, ELVOC, LVOC, SVOC, and IVOC.

**Table S1.** Parts of the peak list for benzene (C<sub>6</sub>H<sub>6</sub>) oxidation products shown in Fig. 1a.

| Category                                       | Formula                                         | <i>m/z</i> (Th) | Fraction of fitted signals |
|------------------------------------------------|-------------------------------------------------|-----------------|----------------------------|
| C <sub>2-5</sub> monomeric products            | C <sub>3</sub> H <sub>4</sub> O <sub>5</sub>    | 181.99          | 9.2%                       |
|                                                | C <sub>4</sub> H <sub>4</sub> O <sub>5</sub>    | 193.99          | 14.3%                      |
|                                                | C <sub>4</sub> H <sub>6</sub> O <sub>5</sub>    | 196.01          | 2.1%                       |
|                                                | C <sub>3</sub> H <sub>4</sub> O <sub>5</sub>    | 205.99          | 6.6%                       |
|                                                | C <sub>3</sub> H <sub>6</sub> O <sub>5</sub>    | 208.01          | 1.5%                       |
|                                                | C <sub>4</sub> H <sub>4</sub> O <sub>6</sub>    | 209.99          | 2.6%                       |
|                                                | C <sub>3</sub> H <sub>4</sub> O <sub>6</sub>    | 221.99          | 7.8%                       |
| C <sub>6</sub> monomeric products              | C <sub>6</sub> H <sub>6</sub> O <sub>5</sub>    | 220.01          | 3.0%                       |
|                                                | C <sub>6</sub> H <sub>7</sub> O <sub>5</sub>    | 221.02          | 0.1%                       |
|                                                | C <sub>6</sub> H <sub>8</sub> O <sub>5</sub>    | 222.03          | 0.4%                       |
|                                                | C <sub>6</sub> H <sub>10</sub> O <sub>5</sub>   | 224.04          | 0.8%                       |
|                                                | C <sub>6</sub> H <sub>5</sub> O <sub>6</sub>    | 235.00          | 0.6%                       |
|                                                | C <sub>6</sub> H <sub>6</sub> O <sub>6</sub>    | 236.00          | 3.1%                       |
|                                                | C <sub>6</sub> H <sub>7</sub> O <sub>6</sub>    | 237.01          | 0.2%                       |
|                                                | C <sub>6</sub> H <sub>8</sub> O <sub>6</sub>    | 238.02          | 1.8%                       |
|                                                | C <sub>6</sub> H <sub>10</sub> O <sub>6</sub>   | 240.04          | 0.2%                       |
|                                                | C <sub>6</sub> H <sub>5</sub> O <sub>7</sub>    | 250.99          | 1.0%                       |
|                                                | C <sub>6</sub> H <sub>6</sub> O <sub>7</sub>    | 252.00          | 2.9%                       |
|                                                | C <sub>6</sub> H <sub>7</sub> O <sub>7</sub>    | 253.01          | 0.4%                       |
|                                                | C <sub>6</sub> H <sub>8</sub> O <sub>7</sub>    | 254.02          | 2.4%                       |
|                                                | C <sub>6</sub> H <sub>9</sub> O <sub>7</sub>    | 255.02          | 0.1%                       |
|                                                | C <sub>6</sub> H <sub>10</sub> O <sub>7</sub>   | 256.03          | 0.5%                       |
|                                                | C <sub>6</sub> H <sub>5</sub> O <sub>8</sub>    | 266.99          | 0.3%                       |
|                                                | C <sub>6</sub> H <sub>6</sub> O <sub>8</sub>    | 267.99          | 1.3%                       |
|                                                | C <sub>6</sub> H <sub>7</sub> O <sub>8</sub>    | 269.00          | 0.2%                       |
|                                                | C <sub>6</sub> H <sub>8</sub> O <sub>8</sub>    | 270.01          | 1.9%                       |
|                                                | C <sub>6</sub> H <sub>9</sub> O <sub>8</sub>    | 271.02          | 0.1%                       |
|                                                | C <sub>6</sub> H <sub>10</sub> O <sub>8</sub>   | 272.03          | 0.9%                       |
|                                                | C <sub>6</sub> H <sub>5</sub> O <sub>9</sub>    | 282.98          | 0.3%                       |
|                                                | C <sub>6</sub> H <sub>6</sub> O <sub>9</sub>    | 283.99          | 0.6%                       |
|                                                | C <sub>6</sub> H <sub>7</sub> O <sub>9</sub>    | 285.00          | 0.9%                       |
|                                                | C <sub>6</sub> H <sub>8</sub> O <sub>9</sub>    | 286.01          | 1.1%                       |
|                                                | C <sub>6</sub> H <sub>9</sub> O <sub>9</sub>    | 287.01          | 0.3%                       |
|                                                | C <sub>6</sub> H <sub>10</sub> O <sub>9</sub>   | 288.02          | 0.4%                       |
|                                                | C <sub>6</sub> H <sub>5</sub> O <sub>10</sub>   | 298.98          | 0.1%                       |
|                                                | C <sub>6</sub> H <sub>6</sub> O <sub>10</sub>   | 299.98          | 0.3%                       |
|                                                | C <sub>6</sub> H <sub>7</sub> O <sub>10</sub>   | 300.99          | 0.6%                       |
| C <sub>6</sub> H <sub>8</sub> O <sub>10</sub>  | 302.00                                          | 0.5%            |                            |
| C <sub>6</sub> H <sub>10</sub> O <sub>10</sub> | 304.02                                          | 0.2%            |                            |
| C <sub>10-11</sub> dimeric products            | C <sub>11</sub> H <sub>14</sub> O <sub>9</sub>  | 352.05          | 0.04%                      |
|                                                | C <sub>10</sub> H <sub>10</sub> O <sub>12</sub> | 384.01          | 0.1%                       |
|                                                | C <sub>10</sub> H <sub>12</sub> O <sub>12</sub> | 386.02          | 0.04%                      |
| C <sub>12</sub> dimeric products               | C <sub>12</sub> H <sub>14</sub> O <sub>8</sub>  | 348.06          | 0.05%                      |
|                                                | C <sub>12</sub> H <sub>14</sub> O <sub>9</sub>  | 364.05          | 0.07%                      |
|                                                | C <sub>12</sub> H <sub>10</sub> O <sub>10</sub> | 376.02          | 0.13%                      |
|                                                | C <sub>12</sub> H <sub>12</sub> O <sub>10</sub> | 378.03          | 0.13%                      |
|                                                | C <sub>12</sub> H <sub>14</sub> O <sub>10</sub> | 380.05          | 0.13%                      |
|                                                | C <sub>12</sub> H <sub>16</sub> O <sub>10</sub> | 382.06          | 0.06%                      |
|                                                | C <sub>12</sub> H <sub>10</sub> O <sub>11</sub> | 392.01          | 0.05%                      |
|                                                | C <sub>12</sub> H <sub>12</sub> O <sub>11</sub> | 394.03          | 0.11%                      |
|                                                | C <sub>12</sub> H <sub>14</sub> O <sub>11</sub> | 396.04          | 0.16%                      |
|                                                | C <sub>12</sub> H <sub>16</sub> O <sub>11</sub> | 398.06          | 0.10%                      |
|                                                | C <sub>12</sub> H <sub>10</sub> O <sub>12</sub> | 408.01          | 0.15%                      |
|                                                | C <sub>12</sub> H <sub>12</sub> O <sub>12</sub> | 410.02          | 0.14%                      |
|                                                | C <sub>12</sub> H <sub>14</sub> O <sub>12</sub> | 412.04          | 0.15%                      |
|                                                | C <sub>12</sub> H <sub>16</sub> O <sub>12</sub> | 414.05          | 0.09%                      |
|                                                | C <sub>12</sub> H <sub>10</sub> O <sub>13</sub> | 424.00          | 0.05%                      |
|                                                | C <sub>12</sub> H <sub>12</sub> O <sub>13</sub> | 426.02          | 0.17%                      |
|                                                | C <sub>12</sub> H <sub>14</sub> O <sub>13</sub> | 428.03          | 0.15%                      |
|                                                | C <sub>12</sub> H <sub>16</sub> O <sub>13</sub> | 430.05          | 0.09%                      |

|                      |        |       |
|----------------------|--------|-------|
| $C_{12}H_{10}O_{14}$ | 440.00 | 0.06% |
| $C_{12}H_{12}O_{14}$ | 442.01 | 0.06% |
| $C_{12}H_{14}O_{14}$ | 444.03 | 0.1%  |
| $C_{12}H_{16}O_{14}$ | 446.04 | 0.05% |

---

**Table S2.** Parts of the peak list for toluene (C<sub>7</sub>H<sub>8</sub>) oxidation products shown in Fig. 1b.

| Category                                        | Formula                                         | <i>m/z</i> (Th)                                | Fraction of total fitted signals |
|-------------------------------------------------|-------------------------------------------------|------------------------------------------------|----------------------------------|
| C <sub>2-6</sub> monomeric products             | C <sub>3</sub> H <sub>4</sub> O <sub>5</sub>    | 181.99                                         | 2.4%                             |
|                                                 | C <sub>4</sub> H <sub>4</sub> O <sub>5</sub>    | 193.99                                         | 5.9%                             |
|                                                 | C <sub>4</sub> H <sub>6</sub> O <sub>5</sub>    | 196.01                                         | 9.5%                             |
|                                                 | C <sub>5</sub> H <sub>4</sub> O <sub>5</sub>    | 205.99                                         | 3.5%                             |
|                                                 | C <sub>5</sub> H <sub>6</sub> O <sub>5</sub>    | 208.01                                         | 5.7%                             |
|                                                 | C <sub>5</sub> H <sub>4</sub> O <sub>6</sub>    | 221.99                                         | 7.2%                             |
| C <sub>7</sub> monomeric products               | C <sub>7</sub> H <sub>8</sub> O <sub>5</sub>    | 234.03                                         | 1.3%                             |
|                                                 | C <sub>7</sub> H <sub>9</sub> O <sub>5</sub>    | 235.03                                         | 0.1%                             |
|                                                 | C <sub>7</sub> H <sub>10</sub> O <sub>5</sub>   | 236.04                                         | 0.6%                             |
|                                                 | C <sub>7</sub> H <sub>7</sub> O <sub>6</sub>    | 249.01                                         | 0.2%                             |
|                                                 | C <sub>7</sub> H <sub>8</sub> O <sub>6</sub>    | 250.02                                         | 3.8%                             |
|                                                 | C <sub>7</sub> H <sub>9</sub> O <sub>6</sub>    | 251.03                                         | 0.2%                             |
|                                                 | C <sub>7</sub> H <sub>10</sub> O <sub>6</sub>   | 252.04                                         | 2.1%                             |
|                                                 | C <sub>7</sub> H <sub>12</sub> O <sub>6</sub>   | 254.05                                         | 0.1%                             |
|                                                 | C <sub>7</sub> H <sub>7</sub> O <sub>7</sub>    | 265.01                                         | 0.2%                             |
|                                                 | C <sub>7</sub> H <sub>8</sub> O <sub>7</sub>    | 266.02                                         | 2.6%                             |
|                                                 | C <sub>7</sub> H <sub>9</sub> O <sub>7</sub>    | 267.02                                         | 0.5%                             |
|                                                 | C <sub>7</sub> H <sub>10</sub> O <sub>7</sub>   | 268.03                                         | 3.0%                             |
|                                                 | C <sub>7</sub> H <sub>11</sub> O <sub>7</sub>   | 269.04                                         | 0.1%                             |
|                                                 | C <sub>7</sub> H <sub>12</sub> O <sub>7</sub>   | 270.05                                         | 0.7%                             |
|                                                 | C <sub>7</sub> H <sub>7</sub> O <sub>8</sub>    | 281.00                                         | 0.2%                             |
|                                                 | C <sub>7</sub> H <sub>8</sub> O <sub>8</sub>    | 282.01                                         | 1.6%                             |
|                                                 | C <sub>7</sub> H <sub>9</sub> O <sub>8</sub>    | 283.02                                         | 0.1%                             |
|                                                 | C <sub>7</sub> H <sub>10</sub> O <sub>8</sub>   | 284.03                                         | 2.0%                             |
|                                                 | C <sub>7</sub> H <sub>11</sub> O <sub>8</sub>   | 285.03                                         | 0.2%                             |
|                                                 | C <sub>7</sub> H <sub>12</sub> O <sub>8</sub>   | 286.04                                         | 1.0%                             |
|                                                 | C <sub>7</sub> H <sub>8</sub> O <sub>9</sub>    | 298.01                                         | 0.4%                             |
|                                                 | C <sub>7</sub> H <sub>9</sub> O <sub>9</sub>    | 299.01                                         | 1.0%                             |
|                                                 | C <sub>7</sub> H <sub>10</sub> O <sub>9</sub>   | 300.02                                         | 1.3%                             |
|                                                 | C <sub>7</sub> H <sub>11</sub> O <sub>9</sub>   | 301.03                                         | 0.2%                             |
|                                                 | C <sub>7</sub> H <sub>12</sub> O <sub>9</sub>   | 302.04                                         | 0.4%                             |
|                                                 | C <sub>7</sub> H <sub>8</sub> O <sub>10</sub>   | 314.00                                         | 0.3%                             |
|                                                 | C <sub>7</sub> H <sub>9</sub> O <sub>10</sub>   | 315.01                                         | 0.4%                             |
|                                                 | C <sub>7</sub> H <sub>10</sub> O <sub>10</sub>  | 316.02                                         | 0.4%                             |
|                                                 | C <sub>7</sub> H <sub>12</sub> O <sub>10</sub>  | 318.03                                         | 0.2%                             |
|                                                 | C <sub>10-13</sub> dimeric products             | C <sub>10</sub> H <sub>10</sub> O <sub>9</sub> | 336.02                           |
| C <sub>12</sub> H <sub>10</sub> O <sub>8</sub>  |                                                 | 344.03                                         | 0.03%                            |
| C <sub>13</sub> H <sub>12</sub> O <sub>9</sub>  |                                                 | 374.04                                         | 0.02%                            |
| C <sub>13</sub> H <sub>14</sub> O <sub>10</sub> |                                                 | 392.05                                         | 0.03%                            |
| C <sub>14</sub> dimeric products                | C <sub>14</sub> H <sub>18</sub> O <sub>8</sub>  | 376.09                                         | 0.03%                            |
|                                                 | C <sub>14</sub> H <sub>16</sub> O <sub>9</sub>  | 390.07                                         | 0.04%                            |
|                                                 | C <sub>14</sub> H <sub>18</sub> O <sub>9</sub>  | 392.08                                         | 0.03%                            |
|                                                 | C <sub>14</sub> H <sub>20</sub> O <sub>9</sub>  | 394.10                                         | 0.01%                            |
|                                                 | C <sub>14</sub> H <sub>16</sub> O <sub>10</sub> | 406.06                                         | 0.06%                            |
|                                                 | C <sub>14</sub> H <sub>18</sub> O <sub>10</sub> | 408.08                                         | 0.1%                             |
|                                                 | C <sub>14</sub> H <sub>20</sub> O <sub>10</sub> | 410.09                                         | 0.04%                            |
|                                                 | C <sub>14</sub> H <sub>16</sub> O <sub>11</sub> | 422.06                                         | 0.08%                            |
|                                                 | C <sub>14</sub> H <sub>18</sub> O <sub>11</sub> | 424.07                                         | 0.08%                            |
|                                                 | C <sub>14</sub> H <sub>20</sub> O <sub>11</sub> | 426.09                                         | 0.11%                            |
|                                                 | C <sub>14</sub> H <sub>16</sub> O <sub>12</sub> | 438.05                                         | 0.07%                            |
|                                                 | C <sub>14</sub> H <sub>18</sub> O <sub>12</sub> | 440.07                                         | 0.13%                            |
|                                                 | C <sub>14</sub> H <sub>20</sub> O <sub>12</sub> | 442.08                                         | 0.07%                            |
|                                                 | C <sub>14</sub> H <sub>16</sub> O <sub>13</sub> | 454.05                                         | 0.07%                            |
|                                                 | C <sub>14</sub> H <sub>18</sub> O <sub>13</sub> | 456.06                                         | 0.1%                             |
|                                                 | C <sub>14</sub> H <sub>20</sub> O <sub>13</sub> | 458.08                                         | 0.08%                            |
|                                                 | C <sub>14</sub> H <sub>16</sub> O <sub>14</sub> | 470.04                                         | 0.05%                            |
|                                                 | C <sub>14</sub> H <sub>18</sub> O <sub>14</sub> | 472.06                                         | 0.07%                            |
| C <sub>14</sub> H <sub>20</sub> O <sub>14</sub> | 474.07                                          | 0.05%                                          |                                  |

**Table S3.** Parts of the peak list for m-xylene (C<sub>8</sub>H<sub>10</sub>) oxidation products shown in Fig. 1c.

| Category                                        | Formula                                         | <i>m/z</i> (Th) | Fraction of total fitted signals |
|-------------------------------------------------|-------------------------------------------------|-----------------|----------------------------------|
| C <sub>2-7</sub> monomeric products             | C <sub>3</sub> H <sub>4</sub> O <sub>5</sub>    | 181.99          | 0.4%                             |
|                                                 | C <sub>4</sub> H <sub>4</sub> O <sub>5</sub>    | 193.99          | 0.7%                             |
|                                                 | C <sub>5</sub> H <sub>4</sub> O <sub>5</sub>    | 205.99          | 0.2%                             |
|                                                 | C <sub>5</sub> H <sub>6</sub> O <sub>5</sub>    | 208.01          | 1.5%                             |
|                                                 | C <sub>4</sub> H <sub>4</sub> O <sub>6</sub>    | 209.99          | 0.3%                             |
|                                                 | C <sub>5</sub> H <sub>8</sub> O <sub>5</sub>    | 210.03          | 0.1%                             |
|                                                 | C <sub>4</sub> H <sub>6</sub> O <sub>6</sub>    | 212.00          | 0.3%                             |
|                                                 | C <sub>5</sub> H <sub>6</sub> O <sub>6</sub>    | 224.00          | 2.5%                             |
| C <sub>8</sub> monomeric products               | C <sub>8</sub> H <sub>10</sub> O <sub>5</sub>   | 248.04          | 0.06%                            |
|                                                 | C <sub>8</sub> H <sub>11</sub> O <sub>5</sub>   | 249.05          | 0.05%                            |
|                                                 | C <sub>8</sub> H <sub>12</sub> O <sub>5</sub>   | 250.06          | 0.2%                             |
|                                                 | C <sub>8</sub> H <sub>8</sub> O <sub>6</sub>    | 262.02          | 0.5%                             |
|                                                 | C <sub>8</sub> H <sub>10</sub> O <sub>6</sub>   | 264.04          | 2.3%                             |
|                                                 | C <sub>8</sub> H <sub>11</sub> O <sub>6</sub>   | 265.04          | 0.7%                             |
|                                                 | C <sub>8</sub> H <sub>12</sub> O <sub>6</sub>   | 266.05          | 1.5%                             |
|                                                 | C <sub>8</sub> H <sub>13</sub> O <sub>6</sub>   | 267.06          | 0.1%                             |
|                                                 | C <sub>8</sub> H <sub>14</sub> O <sub>6</sub>   | 268.07          | 0.2%                             |
|                                                 | C <sub>8</sub> H <sub>8</sub> O <sub>7</sub>    | 278.02          | 1.6%                             |
|                                                 | C <sub>8</sub> H <sub>9</sub> O <sub>7</sub>    | 279.02          | 0.1%                             |
|                                                 | C <sub>8</sub> H <sub>10</sub> O <sub>7</sub>   | 280.03          | 8.6%                             |
|                                                 | C <sub>8</sub> H <sub>11</sub> O <sub>7</sub>   | 281.04          | 0.9%                             |
|                                                 | C <sub>8</sub> H <sub>12</sub> O <sub>7</sub>   | 282.05          | 4.4%                             |
|                                                 | C <sub>8</sub> H <sub>13</sub> O <sub>7</sub>   | 283.05          | 0.4%                             |
|                                                 | C <sub>8</sub> H <sub>14</sub> O <sub>7</sub>   | 284.06          | 1.8%                             |
|                                                 | C <sub>8</sub> H <sub>8</sub> O <sub>8</sub>    | 294.01          | 0.6%                             |
|                                                 | C <sub>8</sub> H <sub>9</sub> O <sub>8</sub>    | 295.02          | 0.1%                             |
|                                                 | C <sub>8</sub> H <sub>10</sub> O <sub>8</sub>   | 296.03          | 6.4%                             |
|                                                 | C <sub>8</sub> H <sub>11</sub> O <sub>8</sub>   | 297.03          | 0.9%                             |
|                                                 | C <sub>8</sub> H <sub>12</sub> O <sub>8</sub>   | 298.04          | 4.6%                             |
|                                                 | C <sub>8</sub> H <sub>13</sub> O <sub>8</sub>   | 299.05          | 0.9%                             |
|                                                 | C <sub>8</sub> H <sub>14</sub> O <sub>8</sub>   | 300.06          | 3.5%                             |
|                                                 | C <sub>8</sub> H <sub>10</sub> O <sub>9</sub>   | 312.02          | 2.6%                             |
|                                                 | C <sub>8</sub> H <sub>11</sub> O <sub>9</sub>   | 313.03          | 1.0%                             |
|                                                 | C <sub>8</sub> H <sub>12</sub> O <sub>9</sub>   | 314.04          | 4.4%                             |
|                                                 | C <sub>8</sub> H <sub>13</sub> O <sub>9</sub>   | 315.04          | 0.6%                             |
|                                                 | C <sub>8</sub> H <sub>14</sub> O <sub>9</sub>   | 316.05          | 2.3%                             |
|                                                 | C <sub>8</sub> H <sub>9</sub> O <sub>10</sub>   | 327.01          | 0.1%                             |
|                                                 | C <sub>8</sub> H <sub>10</sub> O <sub>10</sub>  | 328.02          | 0.5%                             |
|                                                 | C <sub>8</sub> H <sub>11</sub> O <sub>10</sub>  | 329.02          | 0.1%                             |
|                                                 | C <sub>8</sub> H <sub>12</sub> O <sub>10</sub>  | 330.03          | 1.0%                             |
| C <sub>8</sub> H <sub>13</sub> O <sub>10</sub>  | 331.04                                          | 0.5%            |                                  |
| C <sub>8</sub> H <sub>14</sub> O <sub>10</sub>  | 332.05                                          | 0.6%            |                                  |
| C <sub>10-15</sub> dimeric products             | C <sub>14</sub> H <sub>8</sub> O <sub>5</sub>   | 318.03          | 0.14%                            |
|                                                 | C <sub>13</sub> H <sub>10</sub> O <sub>6</sub>  | 324.04          | 0.11%                            |
|                                                 | C <sub>11</sub> H <sub>14</sub> O <sub>8</sub>  | 336.06          | 0.07%                            |
|                                                 | C <sub>14</sub> H <sub>12</sub> O <sub>6</sub>  | 338.05          | 0.16%                            |
|                                                 | C <sub>13</sub> H <sub>10</sub> O <sub>8</sub>  | 356.03          | 0.06%                            |
|                                                 | C <sub>14</sub> H <sub>20</sub> O <sub>10</sub> | 410.09          | 0.18%                            |
| C <sub>16</sub> dimeric products                | C <sub>16</sub> H <sub>18</sub> O <sub>7</sub>  | 384.09          | 0.11%                            |
|                                                 | C <sub>16</sub> H <sub>18</sub> O <sub>8</sub>  | 400.09          | 0.1%                             |
|                                                 | C <sub>16</sub> H <sub>18</sub> O <sub>9</sub>  | 416.08          | 0.08%                            |
|                                                 | C <sub>16</sub> H <sub>20</sub> O <sub>9</sub>  | 418.10          | 0.06%                            |
|                                                 | C <sub>16</sub> H <sub>22</sub> O <sub>9</sub>  | 420.11          | 0.11%                            |
|                                                 | C <sub>16</sub> H <sub>18</sub> O <sub>10</sub> | 432.08          | 0.08%                            |
|                                                 | C <sub>16</sub> H <sub>20</sub> O <sub>10</sub> | 434.09          | 0.14%                            |
|                                                 | C <sub>16</sub> H <sub>22</sub> O <sub>10</sub> | 436.11          | 0.3%                             |
|                                                 | C <sub>16</sub> H <sub>24</sub> O <sub>10</sub> | 438.13          | 0.28%                            |
|                                                 | C <sub>16</sub> H <sub>20</sub> O <sub>11</sub> | 450.09          | 0.26%                            |
|                                                 | C <sub>16</sub> H <sub>22</sub> O <sub>11</sub> | 452.10          | 0.37%                            |
| C <sub>16</sub> H <sub>24</sub> O <sub>11</sub> | 454.12                                          | 0.48%           |                                  |

|                      |        |       |
|----------------------|--------|-------|
| $C_{16}H_{20}O_{12}$ | 466.08 | 0.33% |
| $C_{16}H_{22}O_{12}$ | 468.10 | 0.54% |
| $C_{16}H_{24}O_{12}$ | 470.12 | 0.47% |
| $C_{16}H_{20}O_{13}$ | 482.08 | 0.3%  |
| $C_{16}H_{22}O_{13}$ | 484.09 | 0.46% |
| $C_{16}H_{24}O_{13}$ | 486.11 | 0.47% |
| $C_{16}H_{20}O_{14}$ | 498.07 | 0.19% |
| $C_{16}H_{22}O_{14}$ | 500.09 | 0.32% |
| $C_{16}H_{24}O_{14}$ | 502.10 | 0.27% |

---

**Table S4.** Parts of the peak list for 1,3,5-trimethylbenzene (C<sub>9</sub>H<sub>12</sub>) oxidation products shown in Fig. 1d.

| Category                                        | Formula                                         | <i>m/z</i> (Th) | Fraction of total fitted signals |
|-------------------------------------------------|-------------------------------------------------|-----------------|----------------------------------|
| C <sub>2-8</sub> monomeric products             | C <sub>3</sub> H <sub>4</sub> O <sub>5</sub>    | 181.99          | 0.2%                             |
|                                                 | C <sub>4</sub> H <sub>4</sub> O <sub>5</sub>    | 193.99          | 0.7%                             |
|                                                 | C <sub>5</sub> H <sub>4</sub> O <sub>5</sub>    | 205.99          | 0.1%                             |
|                                                 | C <sub>5</sub> H <sub>6</sub> O <sub>5</sub>    | 208.01          | 0.6%                             |
|                                                 | C <sub>4</sub> H <sub>4</sub> O <sub>6</sub>    | 209.99          | 0.3%                             |
|                                                 | C <sub>5</sub> H <sub>8</sub> O <sub>5</sub>    | 210.03          | 0.1%                             |
|                                                 | C <sub>4</sub> H <sub>6</sub> O <sub>6</sub>    | 212.00          | 0.5%                             |
|                                                 | C <sub>6</sub> H <sub>6</sub> O <sub>5</sub>    | 220.01          | 0.3%                             |
|                                                 | C <sub>5</sub> H <sub>4</sub> O <sub>6</sub>    | 221.99          | 0.5%                             |
|                                                 | C <sub>5</sub> H <sub>6</sub> O <sub>6</sub>    | 224.00          | 0.8%                             |
|                                                 | C <sub>6</sub> H <sub>6</sub> O <sub>6</sub>    | 236.00          | 0.9%                             |
|                                                 | C <sub>6</sub> H <sub>8</sub> O <sub>6</sub>    | 238.02          | 0.9%                             |
|                                                 | C <sub>7</sub> H <sub>10</sub> O <sub>6</sub>   | 252.04          | 0.8%                             |
|                                                 | C <sub>8</sub> H <sub>10</sub> O <sub>6</sub>   | 264.04          | 1.5%                             |
|                                                 | C <sub>7</sub> H <sub>8</sub> O <sub>7</sub>    | 266.02          | 0.7%                             |
|                                                 | C <sub>8</sub> H <sub>10</sub> O <sub>7</sub>   | 280.03          | 3.1%                             |
| C <sub>8</sub> H <sub>12</sub> O <sub>7</sub>   | 282.05                                          | 1.8%            |                                  |
| C <sub>9</sub> monomeric products               | C <sub>9</sub> H <sub>12</sub> O <sub>5</sub>   | 262.06          | 0.2%                             |
|                                                 | C <sub>9</sub> H <sub>13</sub> O <sub>5</sub>   | 263.06          | 0.1%                             |
|                                                 | C <sub>9</sub> H <sub>12</sub> O <sub>6</sub>   | 278.05          | 2.7%                             |
|                                                 | C <sub>9</sub> H <sub>14</sub> O <sub>6</sub>   | 280.07          | 1.4%                             |
|                                                 | C <sub>9</sub> H <sub>16</sub> O <sub>6</sub>   | 282.08          | 0.2%                             |
|                                                 | C <sub>9</sub> H <sub>10</sub> O <sub>7</sub>   | 292.03          | 0.7%                             |
|                                                 | C <sub>9</sub> H <sub>12</sub> O <sub>7</sub>   | 294.05          | 4.4%                             |
|                                                 | C <sub>9</sub> H <sub>13</sub> O <sub>7</sub>   | 295.05          | 0.13%                            |
|                                                 | C <sub>9</sub> H <sub>14</sub> O <sub>7</sub>   | 296.06          | 17.5%                            |
|                                                 | C <sub>9</sub> H <sub>15</sub> O <sub>7</sub>   | 297.07          | 1.6%                             |
|                                                 | C <sub>9</sub> H <sub>16</sub> O <sub>7</sub>   | 298.08          | 3.4%                             |
|                                                 | C <sub>9</sub> H <sub>10</sub> O <sub>8</sub>   | 308.03          | 0.5%                             |
|                                                 | C <sub>9</sub> H <sub>12</sub> O <sub>8</sub>   | 310.04          | 6.0%                             |
|                                                 | C <sub>9</sub> H <sub>13</sub> O <sub>8</sub>   | 311.05          | 0.3%                             |
|                                                 | C <sub>9</sub> H <sub>14</sub> O <sub>8</sub>   | 312.06          | 4.3%                             |
|                                                 | C <sub>9</sub> H <sub>15</sub> O <sub>8</sub>   | 313.07          | 0.5%                             |
|                                                 | C <sub>9</sub> H <sub>16</sub> O <sub>8</sub>   | 314.07          | 3.7%                             |
|                                                 | C <sub>9</sub> H <sub>10</sub> O <sub>9</sub>   | 324.02          | 0.6%                             |
|                                                 | C <sub>9</sub> H <sub>12</sub> O <sub>9</sub>   | 326.04          | 2.3%                             |
|                                                 | C <sub>9</sub> H <sub>13</sub> O <sub>9</sub>   | 327.04          | 0.4%                             |
|                                                 | C <sub>9</sub> H <sub>14</sub> O <sub>9</sub>   | 328.05          | 4.1%                             |
|                                                 | C <sub>9</sub> H <sub>15</sub> O <sub>9</sub>   | 329.06          | 0.4%                             |
|                                                 | C <sub>9</sub> H <sub>16</sub> O <sub>9</sub>   | 330.07          | 2.8%                             |
|                                                 | C <sub>9</sub> H <sub>10</sub> O <sub>10</sub>  | 340.02          | 0.1%                             |
| C <sub>9</sub> H <sub>12</sub> O <sub>10</sub>  | 342.03                                          | 0.9%            |                                  |
| C <sub>9</sub> H <sub>13</sub> O <sub>10</sub>  | 343.04                                          | 0.7%            |                                  |
| C <sub>9</sub> H <sub>14</sub> O <sub>10</sub>  | 344.05                                          | 1.4%            |                                  |
| C <sub>9</sub> H <sub>15</sub> O <sub>10</sub>  | 345.05                                          | 0.5%            |                                  |
| C <sub>9</sub> H <sub>16</sub> O <sub>10</sub>  | 346.06                                          | 0.8%            |                                  |
| C <sub>10-17</sub> dimeric products             | C <sub>11</sub> H <sub>18</sub> O <sub>8</sub>  | 340.09          | 0.09%                            |
|                                                 | C <sub>12</sub> H <sub>18</sub> O <sub>8</sub>  | 352.09          | 0.13%                            |
|                                                 | C <sub>11</sub> H <sub>16</sub> O <sub>9</sub>  | 354.07          | 0.05%                            |
|                                                 | C <sub>14</sub> H <sub>14</sub> O <sub>7</sub>  | 356.06          | 0.05%                            |
|                                                 | C <sub>12</sub> H <sub>10</sub> O <sub>12</sub> | 408.01          | 0.12%                            |
| C <sub>18</sub> dimeric products                | C <sub>18</sub> H <sub>24</sub> O <sub>10</sub> | 462.13          | 0.09%                            |
|                                                 | C <sub>18</sub> H <sub>26</sub> O <sub>10</sub> | 464.14          | 0.19%                            |
|                                                 | C <sub>18</sub> H <sub>28</sub> O <sub>10</sub> | 466.16          | 0.08%                            |
|                                                 | C <sub>18</sub> H <sub>24</sub> O <sub>11</sub> | 478.12          | 0.11%                            |
|                                                 | C <sub>18</sub> H <sub>26</sub> O <sub>11</sub> | 480.14          | 0.13%                            |
|                                                 | C <sub>18</sub> H <sub>28</sub> O <sub>11</sub> | 482.15          | 0.16%                            |
|                                                 | C <sub>18</sub> H <sub>24</sub> O <sub>12</sub> | 494.12          | 0.23%                            |
|                                                 | C <sub>18</sub> H <sub>26</sub> O <sub>12</sub> | 496.13          | 0.37%                            |
| C <sub>18</sub> H <sub>28</sub> O <sub>12</sub> | 498.15                                          | 0.22%           |                                  |

|                      |        |       |
|----------------------|--------|-------|
| $C_{18}H_{24}O_{13}$ | 510.11 | 0.1%  |
| $C_{18}H_{26}O_{13}$ | 512.13 | 0.23% |
| $C_{18}H_{28}O_{13}$ | 514.14 | 0.18% |
| $C_{18}H_{24}O_{14}$ | 526.10 | 0.12% |
| $C_{18}H_{26}O_{14}$ | 528.12 | 0.18% |
| $C_{18}H_{28}O_{14}$ | 530.14 | 0.17% |

---



**Table S5.** Parts of the peak list for naphthalene (C<sub>10</sub>H<sub>8</sub>) oxidation products shown in Fig. 1e.

| Category                                        | Formula                                        | <i>m/z</i> (Th) | Fraction of total fitted signals |
|-------------------------------------------------|------------------------------------------------|-----------------|----------------------------------|
| C <sub>2-9</sub> monomeric products             | C <sub>3</sub> H <sub>4</sub> O <sub>5</sub>   | 181.99          | 8.9%                             |
|                                                 | C <sub>4</sub> H <sub>4</sub> O <sub>5</sub>   | 193.99          | 9.3%                             |
|                                                 | C <sub>4</sub> H <sub>6</sub> O <sub>5</sub>   | 196.01          | 1.7%                             |
|                                                 | C <sub>5</sub> H <sub>4</sub> O <sub>5</sub>   | 205.99          | 3.7%                             |
|                                                 | C <sub>5</sub> H <sub>6</sub> O <sub>5</sub>   | 208.01          | 1.0%                             |
|                                                 | C <sub>4</sub> H <sub>4</sub> O <sub>6</sub>   | 209.99          | 2.3%                             |
|                                                 | C <sub>6</sub> H <sub>6</sub> O <sub>5</sub>   | 220.01          | 1.0%                             |
|                                                 | C <sub>5</sub> H <sub>4</sub> O <sub>6</sub>   | 221.99          | 2.5%                             |
|                                                 | C <sub>5</sub> H <sub>8</sub> O <sub>6</sub>   | 226.02          | 5.6%                             |
|                                                 | C <sub>7</sub> H <sub>6</sub> O <sub>6</sub>   | 248.00          | 0.6%                             |
|                                                 | C <sub>9</sub> H <sub>8</sub> O <sub>7</sub>   | 290.02          | 2.1%                             |
| C <sub>10</sub> monomeric products              | C <sub>10</sub> H <sub>6</sub> O <sub>5</sub>  | 268.01          | 0.6%                             |
|                                                 | C <sub>10</sub> H <sub>7</sub> O <sub>5</sub>  | 269.02          | 0.2%                             |
|                                                 | C <sub>10</sub> H <sub>8</sub> O <sub>5</sub>  | 270.03          | 2.8%                             |
|                                                 | C <sub>10</sub> H <sub>9</sub> O <sub>5</sub>  | 271.03          | 0.4%                             |
|                                                 | C <sub>10</sub> H <sub>10</sub> O <sub>5</sub> | 272.04          | 0.5%                             |
|                                                 | C <sub>10</sub> H <sub>11</sub> O <sub>5</sub> | 273.05          | 0.1%                             |
|                                                 | C <sub>10</sub> H <sub>12</sub> O <sub>5</sub> | 274.06          | 0.2%                             |
|                                                 | C <sub>10</sub> H <sub>13</sub> O <sub>5</sub> | 275.06          | 0.1%                             |
|                                                 | C <sub>10</sub> H <sub>6</sub> O <sub>6</sub>  | 284.00          | 0.5%                             |
|                                                 | C <sub>10</sub> H <sub>7</sub> O <sub>6</sub>  | 285.01          | 0.1%                             |
|                                                 | C <sub>10</sub> H <sub>8</sub> O <sub>6</sub>  | 286.02          | 2.9%                             |
|                                                 | C <sub>10</sub> H <sub>9</sub> O <sub>6</sub>  | 287.03          | 0.3%                             |
|                                                 | C <sub>10</sub> H <sub>10</sub> O <sub>6</sub> | 288.04          | 0.9%                             |
|                                                 | C <sub>10</sub> H <sub>11</sub> O <sub>6</sub> | 289.04          | 0.5%                             |
|                                                 | C <sub>10</sub> H <sub>12</sub> O <sub>6</sub> | 290.05          | 0.3%                             |
|                                                 | C <sub>10</sub> H <sub>13</sub> O <sub>6</sub> | 291.06          | 0.2%                             |
|                                                 | C <sub>10</sub> H <sub>14</sub> O <sub>6</sub> | 292.07          | 0.1%                             |
|                                                 | C <sub>10</sub> H <sub>6</sub> O <sub>7</sub>  | 300.00          | 0.1%                             |
|                                                 | C <sub>10</sub> H <sub>7</sub> O <sub>7</sub>  | 301.01          | 0.3%                             |
|                                                 | C <sub>10</sub> H <sub>8</sub> O <sub>7</sub>  | 302.02          | 1.8%                             |
|                                                 | C <sub>10</sub> H <sub>9</sub> O <sub>7</sub>  | 303.02          | 1.0%                             |
|                                                 | C <sub>10</sub> H <sub>10</sub> O <sub>7</sub> | 304.03          | 1.0%                             |
|                                                 | C <sub>10</sub> H <sub>11</sub> O <sub>7</sub> | 305.04          | 0.3%                             |
|                                                 | C <sub>10</sub> H <sub>12</sub> O <sub>7</sub> | 306.05          | 0.2%                             |
|                                                 | C <sub>10</sub> H <sub>13</sub> O <sub>7</sub> | 307.05          | 0.1%                             |
|                                                 | C <sub>10</sub> H <sub>14</sub> O <sub>7</sub> | 308.06          | 0.1%                             |
|                                                 | C <sub>10</sub> H <sub>6</sub> O <sub>8</sub>  | 315.99          | 0.1%                             |
|                                                 | C <sub>10</sub> H <sub>7</sub> O <sub>8</sub>  | 317.00          | 0.3%                             |
|                                                 | C <sub>10</sub> H <sub>8</sub> O <sub>8</sub>  | 318.01          | 0.5%                             |
|                                                 | C <sub>10</sub> H <sub>9</sub> O <sub>8</sub>  | 319.02          | 1.1%                             |
|                                                 | C <sub>10</sub> H <sub>10</sub> O <sub>8</sub> | 320.03          | 1.0%                             |
|                                                 | C <sub>10</sub> H <sub>11</sub> O <sub>8</sub> | 321.03          | 0.3%                             |
|                                                 | C <sub>10</sub> H <sub>12</sub> O <sub>8</sub> | 322.04          | 0.3%                             |
|                                                 | C <sub>10</sub> H <sub>13</sub> O <sub>8</sub> | 323.05          | 0.1%                             |
|                                                 | C <sub>10</sub> H <sub>14</sub> O <sub>8</sub> | 324.06          | 0.1%                             |
|                                                 | C <sub>10</sub> H <sub>6</sub> O <sub>9</sub>  | 331.99          | 0.1%                             |
|                                                 | C <sub>10</sub> H <sub>7</sub> O <sub>9</sub>  | 333.00          | 0.1%                             |
|                                                 | C <sub>10</sub> H <sub>8</sub> O <sub>9</sub>  | 334.01          | 0.4%                             |
|                                                 | C <sub>10</sub> H <sub>9</sub> O <sub>9</sub>  | 335.01          | 0.3%                             |
|                                                 | C <sub>10</sub> H <sub>10</sub> O <sub>9</sub> | 336.02          | 0.6%                             |
|                                                 | C <sub>10</sub> H <sub>11</sub> O <sub>9</sub> | 337.03          | 0.3%                             |
| C <sub>10</sub> H <sub>12</sub> O <sub>9</sub>  | 338.04                                         | 0.5%            |                                  |
| C <sub>10</sub> H <sub>13</sub> O <sub>9</sub>  | 339.04                                         | 0.1%            |                                  |
| C <sub>10</sub> H <sub>14</sub> O <sub>9</sub>  | 340.05                                         | 0.1%            |                                  |
| C <sub>10</sub> H <sub>7</sub> O <sub>10</sub>  | 348.99                                         | 0.4%            |                                  |
| C <sub>10</sub> H <sub>8</sub> O <sub>10</sub>  | 350.00                                         | 0.2%            |                                  |
| C <sub>10</sub> H <sub>9</sub> O <sub>10</sub>  | 351.01                                         | 0.5%            |                                  |
| C <sub>10</sub> H <sub>10</sub> O <sub>10</sub> | 352.02                                         | 0.7%            |                                  |
| C <sub>10</sub> H <sub>11</sub> O <sub>10</sub> | 353.02                                         | 0.4%            |                                  |
| C <sub>10</sub> H <sub>12</sub> O <sub>10</sub> | 354.03                                         | 0.6%            |                                  |

|                                     |                                                 |        |       |
|-------------------------------------|-------------------------------------------------|--------|-------|
|                                     | C <sub>10</sub> H <sub>7</sub> O <sub>11</sub>  | 364.99 | 0.2%  |
|                                     | C <sub>10</sub> H <sub>8</sub> O <sub>11</sub>  | 366.00 | 0.2%  |
|                                     | C <sub>10</sub> H <sub>6</sub> O <sub>11</sub>  | 367.00 | 0.2%  |
|                                     | C <sub>10</sub> H <sub>10</sub> O <sub>11</sub> | 368.01 | 0.4%  |
|                                     | C <sub>10</sub> H <sub>11</sub> O <sub>11</sub> | 369.02 | 0.2%  |
|                                     | C <sub>10</sub> H <sub>12</sub> O <sub>11</sub> | 370.03 | 0.6%  |
|                                     | C <sub>10</sub> H <sub>13</sub> O <sub>11</sub> | 371.03 | 0.2%  |
|                                     | C <sub>10</sub> H <sub>14</sub> O <sub>11</sub> | 372.04 | 0.3%  |
|                                     | C <sub>10</sub> H <sub>7</sub> O <sub>12</sub>  | 380.98 | 0.1%  |
|                                     | C <sub>10</sub> H <sub>8</sub> O <sub>12</sub>  | 381.99 | 0.1%  |
|                                     | C <sub>10</sub> H <sub>9</sub> O <sub>12</sub>  | 383.00 | 0.1%  |
|                                     | C <sub>10</sub> H <sub>10</sub> O <sub>12</sub> | 384.01 | 0.2%  |
|                                     | C <sub>10</sub> H <sub>11</sub> O <sub>12</sub> | 385.01 | 0.2%  |
|                                     | C <sub>10</sub> H <sub>12</sub> O <sub>12</sub> | 386.02 | 0.4%  |
|                                     | C <sub>10</sub> H <sub>13</sub> O <sub>12</sub> | 387.03 | 0.1%  |
|                                     | C <sub>10</sub> H <sub>14</sub> O <sub>12</sub> | 388.04 | 0.2%  |
| C <sub>11-19</sub> dimeric products | C <sub>11</sub> H <sub>14</sub> O <sub>13</sub> | 416.03 | 0.02% |
|                                     | C <sub>14</sub> H <sub>14</sub> O <sub>12</sub> | 436.04 | 0.04% |
|                                     | C <sub>18</sub> H <sub>12</sub> O <sub>12</sub> | 482.02 | 0.02% |
| C <sub>20</sub> dimeric products    | C <sub>20</sub> H <sub>14</sub> O <sub>8</sub>  | 444.06 | 0.01% |
|                                     | C <sub>20</sub> H <sub>16</sub> O <sub>8</sub>  | 446.07 | 0.02% |
|                                     | C <sub>20</sub> H <sub>16</sub> O <sub>9</sub>  | 462.07 | 0.03% |
|                                     | C <sub>20</sub> H <sub>18</sub> O <sub>9</sub>  | 464.08 | 0.01% |
|                                     | C <sub>20</sub> H <sub>14</sub> O <sub>10</sub> | 476.05 | 0.02% |
|                                     | C <sub>20</sub> H <sub>16</sub> O <sub>10</sub> | 478.06 | 0.03% |
|                                     | C <sub>20</sub> H <sub>18</sub> O <sub>10</sub> | 480.08 | 0.02% |
|                                     | C <sub>20</sub> H <sub>14</sub> O <sub>11</sub> | 492.04 | 0.02% |
|                                     | C <sub>20</sub> H <sub>16</sub> O <sub>11</sub> | 494.06 | 0.03% |
|                                     | C <sub>20</sub> H <sub>18</sub> O <sub>11</sub> | 496.07 | 0.03% |
|                                     | C <sub>20</sub> H <sub>20</sub> O <sub>11</sub> | 498.09 | 0.02% |
|                                     | C <sub>20</sub> H <sub>14</sub> O <sub>12</sub> | 508.04 | 0.02% |
|                                     | C <sub>20</sub> H <sub>16</sub> O <sub>12</sub> | 510.05 | 0.01% |
|                                     | C <sub>20</sub> H <sub>18</sub> O <sub>12</sub> | 512.07 | 0.02% |
|                                     | C <sub>20</sub> H <sub>20</sub> O <sub>12</sub> | 514.08 | 0.03% |
|                                     | C <sub>20</sub> H <sub>22</sub> O <sub>12</sub> | 516.10 | 0.01% |
|                                     | C <sub>20</sub> H <sub>20</sub> O <sub>13</sub> | 530.08 | 0.01% |
|                                     | C <sub>20</sub> H <sub>18</sub> O <sub>14</sub> | 544.06 | 0.02% |
|                                     | C <sub>20</sub> H <sub>20</sub> O <sub>14</sub> | 546.07 | 0.03% |

**Table S6.** Parts of the peak list for 1-methylnaphthalene (C<sub>11</sub>H<sub>10</sub>) oxidation products shown in Fig. 1f.

| Category                                        | Formula                                         | <i>m/z</i> (Th) | Fraction of total fitted signals |
|-------------------------------------------------|-------------------------------------------------|-----------------|----------------------------------|
| C <sub>2-10</sub> monomeric products            | C <sub>3</sub> H <sub>4</sub> O <sub>5</sub>    | 181.99          | 4.1%                             |
|                                                 | C <sub>4</sub> H <sub>4</sub> O <sub>5</sub>    | 193.99          | 2.7%                             |
|                                                 | C <sub>4</sub> H <sub>6</sub> O <sub>5</sub>    | 196.01          | 0.4%                             |
|                                                 | C <sub>5</sub> H <sub>4</sub> O <sub>5</sub>    | 205.99          | 0.8%                             |
|                                                 | C <sub>5</sub> H <sub>6</sub> O <sub>5</sub>    | 208.01          | 1.0%                             |
|                                                 | C <sub>4</sub> H <sub>6</sub> O <sub>6</sub>    | 212.00          | 0.6%                             |
|                                                 | C <sub>5</sub> H <sub>4</sub> O <sub>6</sub>    | 221.99          | 4.0%                             |
|                                                 | C <sub>5</sub> H <sub>6</sub> O <sub>6</sub>    | 224.00          | 3.0%                             |
|                                                 | C <sub>6</sub> H <sub>6</sub> O <sub>6</sub>    | 236.00          | 1.9%                             |
|                                                 | C <sub>5</sub> H <sub>6</sub> O <sub>7</sub>    | 240.00          | 1.2%                             |
|                                                 | C <sub>6</sub> H <sub>6</sub> O <sub>7</sub>    | 252.00          | 2.8%                             |
| C <sub>11</sub> monomeric products              | C <sub>11</sub> H <sub>10</sub> O <sub>5</sub>  | 284.04          | 0.4%                             |
|                                                 | C <sub>11</sub> H <sub>11</sub> O <sub>5</sub>  | 285.05          | 0.05                             |
|                                                 | C <sub>11</sub> H <sub>12</sub> O <sub>5</sub>  | 286.06          | 0.1%                             |
|                                                 | C <sub>11</sub> H <sub>8</sub> O <sub>6</sub>   | 298.02          | 0.7%                             |
|                                                 | C <sub>11</sub> H <sub>9</sub> O <sub>6</sub>   | 299.03          | 0.1%                             |
|                                                 | C <sub>11</sub> H <sub>10</sub> O <sub>6</sub>  | 300.04          | 0.7%                             |
|                                                 | C <sub>11</sub> H <sub>11</sub> O <sub>6</sub>  | 301.04          | 0.1%                             |
|                                                 | C <sub>11</sub> H <sub>12</sub> O <sub>6</sub>  | 302.05          | 0.2%                             |
|                                                 | C <sub>11</sub> H <sub>8</sub> O <sub>7</sub>   | 314.02          | 0.4%                             |
|                                                 | C <sub>11</sub> H <sub>9</sub> O <sub>7</sub>   | 315.02          | 0.2%                             |
|                                                 | C <sub>11</sub> H <sub>10</sub> O <sub>7</sub>  | 316.03          | 0.6%                             |
|                                                 | C <sub>11</sub> H <sub>11</sub> O <sub>7</sub>  | 317.04          | 0.1%                             |
|                                                 | C <sub>11</sub> H <sub>12</sub> O <sub>7</sub>  | 318.05          | 0.4%                             |
|                                                 | C <sub>11</sub> H <sub>14</sub> O <sub>7</sub>  | 320.06          | 0.2%                             |
|                                                 | C <sub>11</sub> H <sub>8</sub> O <sub>8</sub>   | 330.01          | 0.4%                             |
|                                                 | C <sub>11</sub> H <sub>9</sub> O <sub>8</sub>   | 331.02          | 0.1%                             |
|                                                 | C <sub>11</sub> H <sub>10</sub> O <sub>8</sub>  | 332.03          | 0.8%                             |
|                                                 | C <sub>11</sub> H <sub>11</sub> O <sub>8</sub>  | 333.03          | 0.2%                             |
|                                                 | C <sub>11</sub> H <sub>12</sub> O <sub>8</sub>  | 334.04          | 1.0%                             |
|                                                 | C <sub>11</sub> H <sub>13</sub> O <sub>8</sub>  | 335.05          | 0.1%                             |
|                                                 | C <sub>11</sub> H <sub>14</sub> O <sub>8</sub>  | 336.06          | 0.5%                             |
|                                                 | C <sub>11</sub> H <sub>8</sub> O <sub>9</sub>   | 346.01          | 0.3%                             |
|                                                 | C <sub>11</sub> H <sub>9</sub> O <sub>9</sub>   | 347.01          | 0.1%                             |
|                                                 | C <sub>11</sub> H <sub>10</sub> O <sub>9</sub>  | 348.02          | 0.9%                             |
|                                                 | C <sub>11</sub> H <sub>11</sub> O <sub>9</sub>  | 349.03          | 0.1%                             |
|                                                 | C <sub>11</sub> H <sub>12</sub> O <sub>9</sub>  | 350.04          | 1.6%                             |
|                                                 | C <sub>11</sub> H <sub>13</sub> O <sub>9</sub>  | 351.04          | 0.2%                             |
|                                                 | C <sub>11</sub> H <sub>14</sub> O <sub>9</sub>  | 352.05          | 1.1%                             |
|                                                 | C <sub>11</sub> H <sub>16</sub> O <sub>9</sub>  | 354.07          | 0.2%                             |
|                                                 | C <sub>11</sub> H <sub>8</sub> O <sub>10</sub>  | 362.00          | 0.4%                             |
|                                                 | C <sub>11</sub> H <sub>9</sub> O <sub>10</sub>  | 363.01          | 0.2%                             |
|                                                 | C <sub>11</sub> H <sub>10</sub> O <sub>10</sub> | 364.02          | 1.0%                             |
|                                                 | C <sub>11</sub> H <sub>11</sub> O <sub>10</sub> | 365.02          | 0.1%                             |
|                                                 | C <sub>11</sub> H <sub>12</sub> O <sub>10</sub> | 366.03          | 2.1%                             |
|                                                 | C <sub>11</sub> H <sub>13</sub> O <sub>10</sub> | 367.04          | 0.2%                             |
|                                                 | C <sub>11</sub> H <sub>14</sub> O <sub>10</sub> | 368.05          | 1.9%                             |
|                                                 | C <sub>11</sub> H <sub>16</sub> O <sub>10</sub> | 370.06          | 0.5%                             |
|                                                 | C <sub>11</sub> H <sub>10</sub> O <sub>11</sub> | 380.01          | 0.8%                             |
|                                                 | C <sub>11</sub> H <sub>11</sub> O <sub>11</sub> | 381.02          | 0.1%                             |
|                                                 | C <sub>11</sub> H <sub>12</sub> O <sub>11</sub> | 382.03          | 1.8%                             |
|                                                 | C <sub>11</sub> H <sub>13</sub> O <sub>11</sub> | 383.03          | 0.2%                             |
| C <sub>11</sub> H <sub>14</sub> O <sub>11</sub> | 384.04                                          | 1.8%            |                                  |
| C <sub>11</sub> H <sub>16</sub> O <sub>11</sub> | 386.06                                          | 0.7%            |                                  |
| C <sub>11</sub> H <sub>10</sub> O <sub>12</sub> | 396.01                                          | 0.4%            |                                  |
| C <sub>11</sub> H <sub>11</sub> O <sub>12</sub> | 397.01                                          | 0.2%            |                                  |
| C <sub>11</sub> H <sub>12</sub> O <sub>12</sub> | 398.02                                          | 1.3%            |                                  |
| C <sub>11</sub> H <sub>13</sub> O <sub>12</sub> | 399.03                                          | 0.2%            |                                  |
| C <sub>11</sub> H <sub>14</sub> O <sub>12</sub> | 400.04                                          | 1.3%            |                                  |
| C <sub>11</sub> H <sub>16</sub> O <sub>12</sub> | 402.05                                          | 0.6%            |                                  |
| C <sub>11</sub> H <sub>10</sub> O <sub>13</sub> | 412.00                                          | 0.2%            |                                  |

|                                                 |                                                 |        |       |
|-------------------------------------------------|-------------------------------------------------|--------|-------|
|                                                 | C <sub>11</sub> H <sub>11</sub> O <sub>13</sub> | 413.01 | 0.1%  |
|                                                 | C <sub>11</sub> H <sub>12</sub> O <sub>13</sub> | 414.02 | 0.6%  |
|                                                 | C <sub>11</sub> H <sub>13</sub> O <sub>13</sub> | 415.02 | 0.2%  |
|                                                 | C <sub>11</sub> H <sub>14</sub> O <sub>13</sub> | 416.03 | 0.7%  |
|                                                 | C <sub>11</sub> H <sub>16</sub> O <sub>13</sub> | 418.05 | 0.4%  |
|                                                 | C <sub>11</sub> H <sub>10</sub> O <sub>14</sub> | 428.00 | 0.1%  |
|                                                 | C <sub>11</sub> H <sub>12</sub> O <sub>14</sub> | 430.01 | 0.3%  |
|                                                 | C <sub>11</sub> H <sub>13</sub> O <sub>14</sub> | 431.02 | 0.1%  |
|                                                 | C <sub>11</sub> H <sub>14</sub> O <sub>14</sub> | 432.03 | 0.4%  |
|                                                 | C <sub>11</sub> H <sub>16</sub> O <sub>14</sub> | 434.04 | 0.2%  |
| C <sub>12-21</sub> dimeric products             | C <sub>13</sub> H <sub>18</sub> O <sub>4</sub>  | 300.11 | 0.04% |
|                                                 | C <sub>20</sub> H <sub>10</sub> O <sub>5</sub>  | 392.04 | 0.02% |
| C <sub>22</sub> dimeric products                | C <sub>22</sub> H <sub>18</sub> O <sub>9</sub>  | 488.08 | 0.02% |
|                                                 | C <sub>22</sub> H <sub>22</sub> O <sub>9</sub>  | 492.11 | 0.02% |
|                                                 | C <sub>22</sub> H <sub>18</sub> O <sub>10</sub> | 504.08 | 0.02% |
|                                                 | C <sub>22</sub> H <sub>20</sub> O <sub>10</sub> | 506.09 | 0.02% |
|                                                 | C <sub>22</sub> H <sub>22</sub> O <sub>10</sub> | 508.11 | 0.02% |
|                                                 | C <sub>22</sub> H <sub>24</sub> O <sub>10</sub> | 510.13 | 0.02% |
|                                                 | C <sub>22</sub> H <sub>18</sub> O <sub>11</sub> | 520.07 | 0.04% |
|                                                 | C <sub>22</sub> H <sub>20</sub> O <sub>11</sub> | 522.09 | 0.03% |
|                                                 | C <sub>22</sub> H <sub>22</sub> O <sub>11</sub> | 524.10 | 0.04% |
|                                                 | C <sub>22</sub> H <sub>24</sub> O <sub>11</sub> | 526.12 | 0.02% |
|                                                 | C <sub>22</sub> H <sub>20</sub> O <sub>12</sub> | 538.08 | 0.04% |
|                                                 | C <sub>22</sub> H <sub>22</sub> O <sub>12</sub> | 540.10 | 0.05% |
|                                                 | C <sub>22</sub> H <sub>24</sub> O <sub>12</sub> | 542.12 | 0.04% |
|                                                 | C <sub>22</sub> H <sub>18</sub> O <sub>13</sub> | 552.06 | 0.03% |
|                                                 | C <sub>22</sub> H <sub>20</sub> O <sub>13</sub> | 554.08 | 0.03% |
|                                                 | C <sub>22</sub> H <sub>22</sub> O <sub>13</sub> | 556.09 | 0.04% |
|                                                 | C <sub>22</sub> H <sub>24</sub> O <sub>13</sub> | 558.11 | 0.04% |
|                                                 | C <sub>22</sub> H <sub>18</sub> O <sub>14</sub> | 568.06 | 0.01% |
|                                                 | C <sub>22</sub> H <sub>20</sub> O <sub>14</sub> | 570.07 | 0.06% |
|                                                 | C <sub>22</sub> H <sub>22</sub> O <sub>14</sub> | 572.09 | 0.05% |
| C <sub>22</sub> H <sub>24</sub> O <sub>14</sub> | 574.10                                          | 0.04%  |       |

**Table S7.** Fraction of the major C<sub>x</sub>-series monomers, and C<sub>2x</sub>-series dimers selected from Tables S1-S6.

|                                                      | benzene<br>(%) | toluene<br>(%) | m-xylene<br>(%) | 1,3,5-trimethylbenzene<br>(%) | naphthalene<br>(%) | 1-methylnaphthalene<br>(%) |
|------------------------------------------------------|----------------|----------------|-----------------|-------------------------------|--------------------|----------------------------|
| C <sub>x</sub> H <sub>y+1</sub> O <sub>5</sub>       | 0.1            | 0.1            | 0.05            | 0.1                           | 0.4                | 0.05                       |
| C <sub>x</sub> H <sub>y+1</sub> O <sub>6</sub>       | 0.2            | 0.2            | 0.7             | /                             | 0.3                | 0.1                        |
| C <sub>x</sub> H <sub>y+1</sub> O <sub>7</sub>       | 0.4            | 0.5            | 0.9             | 0.13                          | 1                  | 0.1                        |
| C <sub>x</sub> H <sub>y+1</sub> O <sub>8</sub>       | 0.2            | 0.1            | 0.9             | 0.3                           | 1.1                | 0.2                        |
| C <sub>x</sub> H <sub>y+1</sub> O <sub>9</sub>       | 0.9            | 1              | 1               | 0.4                           | 0.3                | 0.1                        |
| C <sub>2x</sub> H <sub>2y</sub> O <sub>10-14</sub>   | 0.6            | 0.3            | 1.2             | 0.7                           | 0.1                | 0.2                        |
| C <sub>2x</sub> H <sub>2y+2</sub> O <sub>10-14</sub> | 0.7            | 0.5            | 2.0             | 1.1                           | 0.1                | 0.2                        |
| C <sub>2x</sub> H <sub>2y+4</sub> O <sub>10-14</sub> | 0.4            | 0.4            | 2.0             | 0.8                           | 0.1                | 0.2                        |

## References

- Bianchi, F., Kurten, T., Riva, M., Mohr, C., Rissanen, M. P., Roldin, P., Berndt, T., Crouse, J. D., Wennberg, P. O., Mentel, T. F., Wildt, J., Junninen, H., Jokinen, T., Kulmala, M., Worsnop, D. R., Thornton, J. A., Donahue, N., Kjaergaard, H. G., and Ehn, M.: Highly oxygenated organic molecules (HOM) from gas-phase autoxidation involving peroxy radicals: a key contributor to atmospheric aerosol, *Chem. Rev.*, 119, 3472-3509, <https://doi.org/10.1021/acs.chemrev.8b00395>, 2019.
- Brune, W. H.: The chamber wall index for gas-wall interactions in atmospheric environmental enclosures, *Environ. Sci. Technol.*, 53, 3645-3652, <https://doi.org/10.1021/acs.est.8b06260>, 2019.
- Cheng, X., Chen, Q., Li, Y., Zheng, Y., Liao, K., and Huang, G.: Highly oxygenated organic molecules produced by the oxidation of benzene and toluene in a wide range of OH exposure and NO<sub>x</sub> conditions, *Atmos. Chem. Phys.*, 21, 12005-12019, <https://doi.org/10.5194/acp-21-12005-2021>, 2021.
- Donahue, N. M., Epstein, S. A., Pandis, S. N., and Robinson, A. L.: A two-dimensional volatility basis set: 1. organic-aerosol mixing thermodynamics, *Atmos. Chem. Phys.*, 11, 3303-3318, <https://doi.org/10.5194/acp-11-3303-2011>, 2011.
- Donahue, N. M., Robinson, A. L., Stanier, C. O., and Pandis, S. N.: Coupled partitioning, dilution, and chemical aging of semivolatile organics, *Environ. Sci. Technol.*, 40, 2635-2643, <https://doi.org/10.1021/es052297c>, 2006.
- Garmash, O., Rissanen, M. P., Pullinen, I., Schmitt, S., Kausiala, O., Tillmann, R., Zhao, D., Percival, C., Bannan, T. J., Priestley, M., Hallquist, Å. M., Kleist, E., Kiendler-Scharr, A., Hallquist, M., Berndt, T., McFiggans, G., Wildt, J., Mentel, T. F., and Ehn, M.: Multi-generation OH oxidation as a source for highly oxygenated organic molecules from aromatics, *Atmos. Chem. Phys.*, 20, 515-537, <https://doi.org/10.5194/acp-20-515-2020>, 2020.
- Huang, Y. L., Zhao, R., Charan, S. M., Kenseth, C. M., Zhang, X., and Seinfeld, J. H.: Unified theory of vapor-wall mass transport in teflon-walled environmental chambers, *Environ. Sci. Technol.*, 52, 2134-2142, <https://doi.org/10.1021/acs.est.7b05575>, 2018.
- Jenkin, M. E., Saunders, S. M., Wagner, V., and Pilling, M. J.: Protocol for the development of the Master Chemical Mechanism, MCM v3 (Part B): tropospheric degradation of aromatic volatile organic compounds, *Atmos. Chem. Phys.*, 3, 181-193, <https://doi.org/10.5194/acp-3-181-2003>, 2003.
- Mohr, C., Thornton, J. A., Heitto, A., Lopez-Hilfiker, F. D., Lutz, A., Riipinen, I., Hong, J., Donahue, N. M., Hallquist, M., Petaja, T., Kulmala, M., and Yli-Juuti, T.: Molecular identification of organic vapors driving atmospheric nanoparticle growth, *Nat. Commun.*, 10, <https://doi.org/10.1038/s41467-019-12473-2>, 2019.
- Nishino, N., Arey, J., and Atkinson, R.: 2-Formylcinnamaldehyde formation yield from the OH radical-initiated reaction of naphthalene: effect of NO<sub>2</sub> concentration, *Environ. Sci. Technol.*, 46, 8198-8204, <https://doi.org/10.1021/es301865t>, 2012.
- Palm, B. B., Campuzano-Jost, P., Ortega, A. M., Day, D. A., Kaser, L., Jud, W., Karl, T., Hansel, A., Hunter, J. F., Cross, E. S., Kroll, J. H., Peng, Z., Brune, W. H., and Jimenez, J. L.: In situ secondary organic aerosol formation from ambient pine forest air using an oxidation flow reactor, *Atmos. Chem. Phys.*, 16, 2943-2970, <https://doi.org/10.5194/acp-16-2943-2016>, 2016.
- Pankow, J. F.: An absorption model of gas/particle partitioning of organic compounds in the atmosphere, *Atmos. Environ.*, 28, 185-188, [https://doi.org/10.1016/1352-2310\(94\)90093-0](https://doi.org/10.1016/1352-2310(94)90093-0), 1994.
- Schervish, M., and Donahue, N. M.: Peroxy radical chemistry and the volatility basis set, *Atmos. Chem. Phys.*, 20, 1183-1199, <https://doi.org/10.5194/acp-20-1183-2020>, 2020.
- Shrivastava, M., Cappa, C. D., Fan, J., Goldstein, A. H., Guenther, A. B., Jimenez, J. L., Kuang, C., Laskin, A., Martin, S. T., Ng, N. L., Petaja, T., Pierce, J. R., Rasch, P. J., Roldin, P., Seinfeld, J. H., Shilling, J., Smith, J. N., Thornton, J. A.,

Volkamer, R., Wang, J., Worsnop, D. R., Zaveri, R. A., Zelenyuk, A., and Zhang, Q.: Recent advances in understanding secondary organic aerosol: implications for global climate forcing, *Rev. Geophys.*, 55, 509-559,

<https://doi.org/10.1002/2016rg000540>, 2017.

Tröstl, J., Chuang, W. K., Gordon, H., Heinritzi, M., Yan, C., Molteni, U., Ahlm, L., Frege, C., Bianchi, F., Wagner, R., Simon, M., Lehtipalo, K., Williamson, C., Craven, J. S., Duplissy, J., Adamov, A., Almeida, J., Bernhammer, A.-K., Breitenlechner, M., Brilke, S., Dias, A., Ehrhart, S., Flagan, R. C., Franchin, A., Fuchs, C., Guida, R., Gysel, M., Hansel, A., Hoyle, C. R., Jokinen, T., Junninen, H., Kangasluoma, J., Keskinen, H., Kim, J., Krapf, M., Kürten, A., Laaksonen, A., Lawler, M., Leiminger, M., Mathot, S., Möhler, O., Nieminen, T., Onnela, A., Petäjä, T., Piel, F. M., Miettinen, P., Rissanen, M. P., Rondo, L., Sarnela, N., Schobesberger, S., Sengupta, K., Sipilä, M., Smith, J. N., Steiner, G., Tomè, A., Virtanen, A., Wagner, A. C., Weingartner, E., Wimmer, D., Winkler, P. M., Ye, P., Carslaw, K. S., Curtius, J., Dommen, J., Kirkby, J., Kulmala, M., Riipinen, I., Worsnop, D. R., Donahue, N. M., and Baltensperger, U.: The role of low-volatility organic compounds in initial particle growth in the atmosphere, *Nature*, 533, 527-531, <https://doi.org/10.1038/nature18271>, 2016.
